# Supplementary material
Source: PubMed Central journal article supplement (PMC6616260)
Supplement: ba028332-suppl1.pdf [file ba028332-suppl1.pdf]

# Supplementary Table 1A. Patient disease and outcome details of IV IL-15 with HaploNK infusion.

| No | Age | Gender | Dose level | Prior Disease | Cytogenetics       | Molecular          | CG/Mole-<br>cular risk | Prior #<br>therapies<br>total | Prior<br>AlloHCT | Bone<br>Marrow<br>Blasts (%) | Disease<br>Status at<br>Treatment | KIR ligand<br>mismatch | NK<br>expansion<br>Day 14 | #IL-15<br>doses | CMV<br>donor | CMV<br>recipient | Donor<br>Chimerism<br>day 7 | Donor<br>chimerism<br>day 14 | Disease<br>Response | Post-NK<br>AlloHCT | Duration of<br>Remission | Time to<br>death/last<br>follow-up<br>(mo.) | Survival<br>Status |
|----|-----|--------|------------|---------------|--------------------|--------------------|------------------------|-------------------------------|------------------|------------------------------|-----------------------------------|------------------------|---------------------------|-----------------|--------------|------------------|-----------------------------|------------------------------|---------------------|--------------------|--------------------------|---------------------------------------------|--------------------|
| 1  | 54  | F      | 0.25       | Primary AML   | normal             |                    | Int                    | 2                             | no               | 9                            | PIF                               | no                     | No                        | 12              | Positive     | Negative         | n/a                         | 0                            | CR                  | yes                | 155                      | 33.3                                        | Dead               |
| 2  | 49  | M      | 0.25       | Primary AML   | normal             |                    | Int                    | 2                             | no               | 37                           | PIF                               | no                     | No                        | 12              | Positive     | Negative         | 25                          | 0                            | CR                  | yes                | 1353                     | 49.1                                        | Dead               |
| 3  | 39  | M      | 0.25       | Primary AML   | t(11;19)           | FLT3 ITD           | Int                    | 2                             | no               | 3                            | PIF                               | yes                    | No                        | 12              | Positive     | Negative         | 17                          | 0                            | PD                  | no                 |                          | 9.0                                         | Dead               |
| 4  | 52  | M      | 0.5        | Primary AML   | normal             |                    | Good                   | 2                             | no               | 9                            | PIF                               | no                     | No                        | 12              | Negative     | Negative         | 43                          | 2                            | Cri                 | yes                | 739                      | 26.4                                        | Dead               |
| 5  | 23  | M      | 0.5        | Primary AML   | t(12;13)           |                    | Adverse                | 2                             | no               | 65                           | PIF                               | no                     | No                        | 12              | Positive     | Positive         | 36                          | 0                            | PD                  | no                 |                          | 4.5                                         | Dead               |
| 6  | 26  | F      | 0.5        | Primary AML   | normal             |                    | Int                    | 2                             | no               | 12                           | Relapse                           | no                     | No                        | 12              | Negative     | Negative         | 41                          | 2                            | PD                  | no                 |                          | 3.7                                         | Dead               |
| 7  | 49  | F      | 0.75       | Primary AML   | inv(3)             |                    | Adverse                | 2                             | no               | 11                           | Relapse                           | no                     | No                        | 12              | Positive     | Positive         | 11                          | 0                            | PD                  | no                 |                          | 9.0                                         | Dead               |
| 8  | 64  | M      | 0.75       | Primary AML   | normal             | FLT3 D835,<br>NPM1 | Int                    | 5                             | no               | 3                            | Relapse                           | no                     | No                        | 12              | Negative     | Negative         | 33                          | 92                           | CRi                 | no                 | 71                       | 2.5                                         | Dead               |
| 9  | 27  | M      | 0.75       | Primary AML   | t(11;19)           | MLL                | Int                    | 3                             | no               | 17                           | Relapse                           | no                     | No                        | 12              | Positive     | Negative         | 13                          | 0                            | PD                  |                    |                          | 0.8                                         | Dead               |
| 10 | 23  | F      | 0.75       | Primary AML   | t(11;19)           | MLL                | Int                    | 3                             | no               | 21                           | PIF                               | yes                    | No                        | 12              | Positive     | Positive         | 18                          | 0                            | PD                  | no                 |                          | 3.2                                         | Dead               |
| 11 | 22  | M      | 0.75       | Primary AML   | t(19;21), +13, +22 | FLT3 ITD           | Adverse                | 5                             | no               | 62                           | Relapse                           | yes                    | No                        | 12              | Negative     | Negative         | 57                          | 0                            | PD                  | no                 |                          | 3.6                                         | Dead               |
| 12 | 58  | F      | 0.75       | Primary AML   | del12, t(8;15)     |                    | Int                    | 3                             | no               | 54                           | PIF                               | no                     | No                        | 12              | Negative     | Positive         | 11                          | 0                            | PD                  | no                 |                          | 16.2                                        | Dead               |
| 13 | 25  | M      | 0.75       | Primary AML   | complex            |                    | Adverse                | 5                             | no               | 92                           | Relapse                           | no                     | No                        | 9               | Positive     | Negative         | 5                           | 31                           | PD                  | no                 |                          | 0.8                                         | Dead               |
| 14 | 63  | M      | 0.75       | Primary AML   | normal             | FLT3 ITD           | Adverse                | 2                             | no               | 93                           | PIF                               | yes                    | No                        | 11              | Negative     | Negative         | 67                          | 0                            | PD                  | no                 |                          | 4.4                                         | Dead               |
| 15 | 59  | M      | 0.75       | MPN           | complex            |                    | Adverse                | 2                             | no               | 7                            | PIF                               | no                     | No                        | 12              | Negative     | Positive         | 10                          | 0                            | CR                  | yes                | 95                       | 3.6                                         | Dead               |
| 16 | 38  | F      | 0.75       | Primary AML   | polysomy 21        |                    | Int                    | 5                             | yes              | 35                           | Relapse                           | no                     | n/a                       | 12              | Positive     | Positive         | n/a                         | n/a                          | PD                  | no                 |                          | 1.2                                         | Dead               |
| 17 | 49  | F      | 0.75       | t-AML         | normal             |                    | Int                    | 2                             | no               | 13                           | PIF                               | no                     | Yes                       | 12              | Negative     | Negative         | 85                          | 97                           | PD                  | no                 |                          | 0.9                                         | Dead               |
| 18 | 62  | M      | 0.75       | Primary AML   | t(1;3)             |                    | Int                    | 3                             | no               | 3                            | Relapse                           | no                     | Yes                       | 12              | Negative     | Negative         | 89                          | 90                           | PD                  | no                 |                          | 5.1                                         | Dead               |
| 19 | 65  | F      | 0.75       | Primary AML   | t(3;8)             | FLT3 ITD           | Int                    | 4                             | no               | 61                           | Relapse                           | no                     | Yes                       | 12              | Negative     | Positive         | 65                          | 0                            | PD                  | no                 |                          | 3.1                                         | Dead               |
| 20 | 56  | F      | 0.75       | MDS           | complex            | TP53 del           | Adverse                | 6                             | yes              | 50                           | Relapse                           | no                     | Yes                       | 12              | Negative     | Positive         | 15                          | 70                           | PD                  | no                 |                          | 1.0                                         | Dead               |
| 21 | 66  | M      | 0.75       | Primary AML   | complex            | MECOM-RPN1         | Adverse                | 2                             | no               | 30                           | PIF                               | no                     | Yes                       | 11              | Positive     | Positive         | 67                          | n/a                          | PD                  | no                 |                          | 3.6                                         | Dead               |
| 22 | 68  | F      | 0.75       | MDS           | inv(3)(q21q26.2)   | MECOM-RPN1         | Adverse                | 5                             | yes              | 60                           | Relapse                           | no                     | Yes                       | 12              | Negative     | Negative         | 57                          | 99                           | CRi                 | yes                | 118                      | 4.3                                         | Dead               |
| 23 | 67  | M      | 1          | Primary AML   | trisomy 11         | MLL                | Adverse                | 2                             | no               | 55                           | PIF                               | yes                    | No                        | 8               | Negative     | Negative         | 37                          | 0                            | CR                  | no                 | 43                       | 2.9                                         | Dead               |
| 24 | 52  | F      | 1          | Primary AML   | normal             |                    | Int                    | 2                             | no               | 90                           | Relapse                           | no                     | No                        | 11              | Negative     | Positive         | 0                           | 0                            | CRi                 | no                 | 80                       | 2.9                                         | Dead               |
| 25 | 65  | M      | 1          | MPN           | del7q, del20q      |                    | Int                    | 2                             | no               | 24                           | PIF                               | no                     | Yes                       | 9               | Negative     | Negative         | 80                          | 96                           | N/A                 | no                 |                          | 0.6                                         | Dead               |
| 26 | 36  | F      | 1          | Primary AML   | trisomy 21         |                    | Int                    | 3                             | no               | 8                            | Relapse                           | yes                    | Yes                       | 9               | Positive     | Positive         | 86                          | 97                           | PD                  | no                 |                          | 2.1                                         | Dead               |

\* denotes prior allogeneic transplantation

\*\* denotes post-NK infusion allogeneic transplantation

Abbreviations: CG = Cytogenetics, Int = Intermediate, Fav = Fav, PIF = primary induction failure, alloHCT = allogeneic hematopoietic stem cell transplantation, CR = Complete Remission, CRi = Complete Remission with Incomplete Count Recovery, PD = Progressive Disease, MPN = myeloproliferative neoplasm, MDS = myelodysplastic syndrome, t-AML = therapy-related AML

Supplementary Table 1B. Patient disease and outcome details of SC IL-15 with HaploNK infusion.

| No. | Age | Gender | Prior disease | CG                                 | Molecular                              | CG/Mol. risk | # Prior therapies | Prior alloHCT | Bone Marrow Blasts (%) | Disease Status at treatment | KIR ligand mismatch | NK expansion (D14) | #IL-15 doses | Donor CMV | Recipient CMV | Donor chimerism (D7) | Donor chimerism (D14) | Disease Response (D28) | Duration of Remission (days) | Time to death/last follow-up (mo.) | Survival Status |
|-----|-----|--------|---------------|------------------------------------|----------------------------------------|--------------|-------------------|---------------|------------------------|-----------------------------|---------------------|--------------------|--------------|-----------|---------------|----------------------|-----------------------|------------------------|------------------------------|------------------------------------|-----------------|
| 1   | 71  | M      | MDS           | del21q22                           | Loss of RUNX1                          | Int          | 2*                | No            | 26                     | Relapse                     | Yes                 | No                 | 6            | Neg       | Pos           | 60                   | 0                     | PD                     |                              | 3.3                                | Dead            |
| 2   | 70  | M      | MDS/CM ML     | normal                             |                                        | Int          | 2                 | Yes           | 70                     | Relapse                     | Yes                 | n/a                | 5            | Neg       | Neg           | n/a                  | n/a                   | Not Assessed           |                              | 0.4                                | Dead            |
| 3   | 40  | M      | MDS           | t(3;10), t(1,11)                   | MECOM                                  | Adverse      | 3                 | Yes           | 60                     | Relapse                     | No                  | Yes                | 10           | Neg       | Pos           | n/a                  | 50                    | PD                     |                              | 12.3                               | Dead            |
| 4   | 32  | F      | Primary AML   | t(8;21)                            | c-kit                                  | Fav          | 4                 | Yes           | 0                      | Relapse                     | Yes                 | No                 | 6            | Pos       | Pos           | 50                   | 100                   | PD                     |                              | 1.0                                | Dead            |
| 5   | 66  | M      | Primary AML   | monosomy 7                         | n/a                                    | Adverse      | 2                 | No            | 3.8                    | PIF                         | Yes                 | No                 | 6            | Pos       | Neg           | 32                   | 0                     | CRi                    | 65**                         | 7.2                                | Dead            |
| 6   | 64  | M      | Primary AML   | complex                            | n/a                                    | Adverse      | 2                 | No            | 12                     | PIF                         | Yes                 | No                 | 8            | Neg       | Pos           | 73                   | 0                     | PD                     |                              | 2.0                                | Dead            |
| 7   | 62  | M      | Primary AML   | normal                             | kitD816v                               | Int          | 2                 | No            | 7                      | PIF                         | No                  | No                 | 9            | Pos       | Pos           | 18                   | 0                     | CRi                    | 189**                        | 10.3                               | Dead            |
| 8   | 48  | F      | MDS           | normal                             | n/a                                    | Int          | 2                 | No            | 10                     | PIF                         | Yes                 | No                 | 5            | Neg       | Pos           | 24                   | 0                     | CRi                    | 426**                        | 16.7                               | Alive           |
| 9   | 63  | M      | CMML          | t(x;12), t(5;13)                   | FLT3 ITD                               | Adverse      | 3*                | No            | 2                      | Relapse                     | No                  | No                 | 8            | Neg       | Pos           | 37                   | 0                     | CRi                    | 354**                        | 13.1                               | Alive           |
| 10  | 65  | M      | MDS           | complex                            | TP53, CEBPA                            | Adverse      | 2*                | No            | 8                      | PIF                         | No                  | Yes                | 1            | Neg       | Pos           | 37                   | 82                    | PD                     |                              | 1.3                                | Dead            |
| 11  | 68  | M      | CMML          | -7                                 | ETV6                                   | Adverse      | 2                 | No            | 40                     | PIF                         | unknown             | No                 | 9            | Neg       | Neg           | 47                   | 0                     | PD                     |                              | 5.3                                | Dead            |
| 12  | 62  | M      | MDS           | del5q, del17                       | TP53                                   | Adverse      | 2                 | No            | 10                     | PIF                         | No                  | Yes                | 10           | Neg       | Neg           | 43                   | 100                   | CRi                    | 386**                        | 20.1                               | Alive           |
| 13  | 20  | F      | Primary AML   | t(6;9), del7                       | DEK-NUP214 fusion, FLT3 ITD, KRAS, WT1 | Adverse      | 3*                | No            | 56                     | PIF                         | No                  | No                 | 10           | Neg       | Neg           | 27                   | 0                     | PD                     |                              | 1.6                                | Dead            |
| 14  | 67  | M      | Primary AML   | normal                             | NPM1                                   | Fav          | 2                 | No            | 64                     | Relapse                     | No                  | No                 | 10           | Neg       | Neg           | 23                   | 0                     | CR                     | 201**                        | 11.5                               | Dead            |
| 15  | 67  | F      | MDS           | der(3;5), del12, del15q, trisomy 8 |                                        | Adverse      | 2                 | No            | 4                      | PIF                         | No                  | Yes                | 9            | Pos       | Pos           | 59                   | 76                    | PD                     |                              | 2.0                                | Unknown         |
| 16  | 58  | M      | Primary AML   | MECOM-t(3;3)                       | RPN1 fusion                            | Adverse      | 2                 | No            | 28                     | PIF                         | No                  | No                 | 5            | Neg       | Neg           | n/a                  | 0                     | PD                     |                              | 5.0                                | Dead            |

\*denotes prior allogeneic transplantation

\*\* denotes post-NK infusion allogeneic transplantation

Abbreviations: CG = Cytogenetics, Int = Intermediate, Fav = Fav, PIF = primary induction failure, alloHCT = allogeneic hematopoietic stem cell transplantation, CR = Complete Remission, CRi = Complete Remission with Incomplete Count Recovery, PD = Progressive Disease

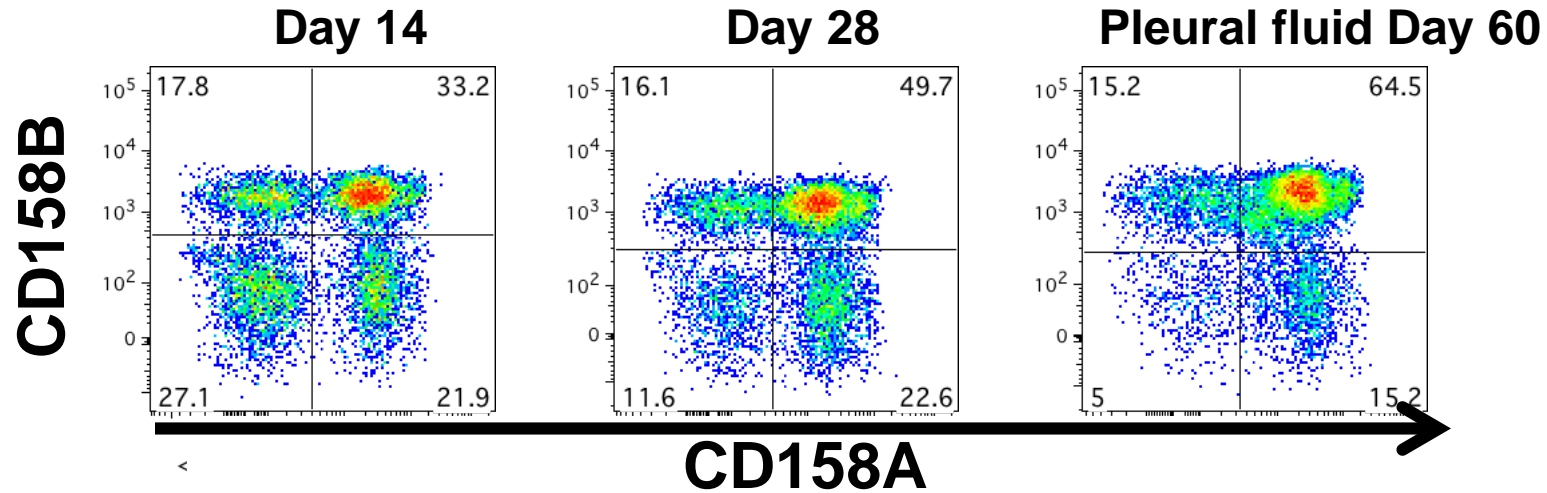

Supplemental Figure 1. Mononuclear cells were taken from a subject on the 1 mcg/kg cohort at 14 and 28 days after adoptive transfer. After developing pneumonia and a pleural effusion, a thoracentesis at day 60 was evaluated along with the samples from peripheral blood. Shown are CD56<sup>+</sup>/CD3<sup>-</sup> gated NK cells from each sample for the expression of CD158A (KIR2DL1/S1) and CD158B (KIR2DL2/L3/S2). This data shows the polyclonal nature of this population which by chimerism studies is >90% donor in origin.
